# Supplementary material for: Electrochemically induced reversible formation of carboxymethyl chitin hydrogel and tunable protein release
Source: Royal Society of Chemistry journal article supplement (doi:10.1039/c4nj01704h), 2014-11-27
Supplement: c4nj01704h1.pdf [file c4nj01704h1.pdf]

## **Electrochemically induced reversible formation of carboxymethyl chitin hydrogel and tunable protein release**

Fuyuan Ding, Xi Qian, Qi Zhang, Hongjie Wu, Youyu Liu, Ling Xiao, Hongbing Deng, Yumin  
Du, Xiaowen Shi\*

School of Resource and Environmental Science and Hubei Biomass-Resource  
Chemistry and Environmental Biotechnology Key Laboratory, Wuhan University,  
Wuhan, 430079, China

Corresponding Author: \* E-mail: [shixwwhu@163.com](mailto:shixwwhu@163.com).

### **1. The amount of iron in the hydrogel**

The total amount of iron in the hydrogel was determined by method of phenanthroline spectrophotometric<sup>1, 2</sup>. Briefly, the electrodeposited hydrogel on the iron electrode was dissolved in 10 mL 0.1 M Na<sub>2</sub>SO<sub>4</sub> containing ascorbic acid (10 mM). Then, 10 mL of the resulted solution, 2.5 mL of hydroxylamine hydrochloride (1%), 5.0 mL of HAc/NaAc (pH=4.6) and 5.0 mL of phenanthroline (0.1%) were added into a 50 mL volumetric flask. Ultrapure water was added to the scale. The volumetric flask was shaken to mix the solution. The final solution was put still for 10 min before test. The Fe<sup>3+</sup> concentration in the solution was recorded on a UNICO UV-2000 Spectrophotometer at 510 nm. The solution without Fe<sup>3+</sup> was used as a control. Ferrous ammonium sulfate was used for calibrating the Fe<sup>3+</sup> analysis.

1. Z. Jin, G. Güven, V. Bocharova, J. Halámek, I. Tokarev, S. Minko, A. Melman, D. Mandler and E. Katz, *ACS Applied Materials & Interfaces*, 2012, **4**, 466-475.
2. D. A. Skoog, D. M. West and F. J. Holler, *Analytical chemistry: an introduction*, Saunders College Pub., 2000.
